# Supplementary material
Source: PubMed Central journal article supplement (PMC3680006)
Supplement: supp_13-11891_IOVS-13-11891-s01.pdf [file supp_13-11891_IOVS-13-11891-s01.pdf]

| #  | Age (yrs) | Gender | Race/Ethnicity | Diagnosis                                        | Lutein + Zeaxanthin Intake (mcg/kg/day) | Total Carotenoid Intake (mcg/kg/day) | Serum Lutein (ng/ml) | Serum Zeaxanthin (ng/ml) | Total Serum Carotenoids (ng/ml) | Skin Raman (Counts) | MPOD Right Eye | MPOD Left Eye |
|----|-----------|--------|----------------|--------------------------------------------------|-----------------------------------------|--------------------------------------|----------------------|--------------------------|---------------------------------|---------------------|----------------|---------------|
| 1  | 1.67      | M      | Cauc.          | Lamellar dermoid with graft OD                   | NI                                      | NI                                   | 83.16                | 26.14                    | 463.6                           | 18,850              | NI             | 0.03          |
| 2  | 5.75      | F      | Cauc.          | Coloboma OS>OD                                   | 7                                       | 98.32                                | 82.91                | 25.47                    | 596.6                           | 44,923              | 0.29           | NI            |
| 3  | 0.58      | F      | Cauc.          | PHPV OS                                          | 50                                      | 447.16                               | NI                   | NI                       | NI                              | 12,646              | 0.21           | NI            |
| 4  | 2.25      | F      | Hisp.          | ROP with laser, Strabismus                       | NI                                      | NI                                   | 5.61                 | 0.98                     | 58.3                            | 12,890              | NI             | 0.28          |
| 5  | 2.83      | F      | Cauc.          | Corneal laceration, traumatic cataract, PCIOL OS | NI                                      | NI                                   | 80.34                | 39.89                    | 414.4                           | 36,079              | 0.11           | NI            |
| 6  | 2.08      | M      | Cauc.          | Congen. Glaucoma                                 | NI                                      | NI                                   | 63.83                | 20.92                    | 290.8                           | 27,908              | BQ             | BQ            |
| 7  | 0.33      | F      | Cauc.          | Port wine stain face (OD), blocked tear duct     | 0.3                                     | 16.41                                | 77.59                | 22.74                    | 409.6                           | 21,463              | 0.33           | 0.29          |
| 8  | 1.17      | F      | Cauc.          | Ectropion uvea OS with risk of glaucoma          | NI                                      | NI                                   | 66.19                | 26.17                    | 749.6                           | 77,509              | 0.16           | 0.13          |
| 9  | 2.92      | F      | Cauc.          | Inherited bilateral RB                           | NI                                      | NI                                   | 81.32                | 25.02                    | 280.2                           | 26,067              | 0.37           | NI            |
| 10 | 6         | F      | Cauc.          | History of ROP                                   | NI                                      | NI                                   | 5.9                  | 0                        | 62.9                            | 7,861               | 0.25           | NI            |
| 11 | 3.92      | F      | Cauc.          | Unilateral RB OS, history of chemo               | 27.44                                   | 126.41                               | 143.39               | 35.18                    | 761                             | 46,271              | 0.14           | NI            |
| 12 | 0.9       | M      | Cauc.          | Unilateral RB OS, history of enucleation         | 78                                      | 361.96                               | 55.21                | 14.46                    | 777.7                           | 31,256              | 0.21           | NI            |
| 13 | 2.42      | M      | Cauc.          | Family history RB                                | 44                                      | 238.83                               | 60.47                | 29.83                    | 430.2                           | 37,134              | 0.26           | 0.21          |
| 14 | 1.25      | F      | Cauc.          | At risk for vigabatrin toxicity                  | 47                                      | 153.47                               | 42.06                | 7.27                     | 496.7                           | 40,340              | BQ             | 0.16          |
| 15 | 1.67      | F      | Cauc.          | Incontinentia pigmenti vs FEVR                   | 32                                      | 82.05                                | 92.16                | 19.14                    | 343.7                           | 26,921              | BQ             | 0.28          |
| 16 | -0.1      | F      | Cauc.          | ROP Screening                                    | 3.48                                    | 18.699                               | 80.73                | 23.83                    | 222.3                           | 0                   | BQ             | BQ            |

|    |      |   |       |                                                                   |      |        |        |       |        |        |      |      |
|----|------|---|-------|-------------------------------------------------------------------|------|--------|--------|-------|--------|--------|------|------|
| 17 | 3.83 | M | Cauc. | Strabismus                                                        | 11   | 16.45  | 71.19  | 29.81 | 373.4  | 30,480 | 0.11 | 0.13 |
| 18 | -0.1 | F | Cauc. | ROP Screening                                                     | 0.71 | 2.379  | 5.88   | 2.33  | 11.3   | 0      | 0.00 | 0    |
| 19 | -0.1 | M | Cauc. | ROP Screening                                                     | 0    | 0      | 12.86  | 31.2  | 60.3   | 0      | 0    | 0    |
| 20 | -0.2 | F | MR    | ROP Screening                                                     | 0.72 | 3.19   | NI     | NI    | NI     | NI     | 0    | 0    |
| 21 | 0.67 | M | Cauc. | Central vision loss & optic neuropathy with shunted hydrocephalus | 2    | 6.41   | 36.74  | 3.85  | 313.5  | DNV    | 0.25 | 0.17 |
| 22 | 4.92 | M | Cauc. | Optic atrophy                                                     | 67   | 386.74 | 108.2  | 34.77 | 635.7  | DNV    | BQ   | 0.28 |
| 23 | 1.25 | F | Cauc. | Bilateral aphakia, glaucoma OD                                    | 46   | 90.99  | 99.9   | 16.41 | 804    | DNV    | 0.06 | BQ   |
| 24 | 3.33 | M | Cauc. | Sibling with RB, patient normal OU                                | 33   | 90.7   | 58.42  | 19.15 | 713.6  | DNV    | 0.37 | 0.26 |
| 25 | -0.1 | M | Cauc. | ROP Screening                                                     | NI   | NI     | NI     | NI    | NI     | 1,936  | 0    | 0    |
| 26 | -0.1 | M | Cauc. | ROP Screening                                                     | NI   | NI     | NI     | NI    | NI     | 0      | 0    | 0    |
| 27 | -0.1 | M | Cauc. | ROP Screening                                                     | NI   | NI     | NI     | NI    | NI     | 0      | 0    | 0    |
| 28 | -0.1 | M | Cauc. | ROP Screening                                                     | NI   | NI     | NI     | NI    | NI     | 0      | BQ   | BQ   |
| 29 | 1.17 | M | Cauc. | History of ROP, Strabismus                                        | 184  | 593.99 | 66.21  | 13.67 | 1528.5 | 71,806 | 0.19 | BQ   |
| 30 | 2.25 | M | Cauc. | Strabismus                                                        | NI   | NI     | 115.56 | 35.25 | 358.2  | DNV    | 0.26 | 0.25 |
| 31 | 4.67 | F | Cauc. | Bilateral PCIOL                                                   | NI   | NI     | 25.85  | 12.39 | 123.21 | NI     | BQ   | BQ   |
| 32 | 4.01 | M | Cauc. | Strabismus                                                        | 31   | 118.36 | 28.09  | 8.43  | 177.84 | 31,554 | 0.08 | 0.08 |
| 33 | -0.1 | M | Cauc. | ROP Screening                                                     | NI   | NI     | 2.11   | 1.16  | 4.62   | 0      | 0    | 0    |
| 34 | -0.2 | F | Hisp. | ROP Screening                                                     | 0.86 | 1.353  | 2.06   | 0.59  | 4.64   | 0      | 0    | 0    |
| 35 | 5.01 | M | Cauc. | Retinoblastoma                                                    | NI   | NI     | 32.62  | 11.1  | 229.27 | 40,139 | NI   | NI   |
| 36 | 1.17 | F | Hisp. | ON hypoplasia                                                     | NI   | NI     | 8.82   | 3.3   | 57.61  | 21,279 | 0.06 | 0.07 |
| 37 | 2.55 | M | Cauc. | Nystagmus, History of prematurity                                 | 70.5 | 804.72 | 40.61  | 9.91  | 237.49 | 35,346 | BQ   | 0.07 |
| 38 | 2.92 | F | Cauc. | Possible vigabatrin toxicity                                      | 21.8 | 25.32  | 35.81  | 10.18 | 168.76 | 12,950 | 0.08 | 0.10 |
| 39 | 5.08 | F | MR    | ROP with history of laser                                         | 0    | 84.75  | 16.29  | 0.79  | 246.03 | 27,788 | 0.11 | 0.11 |
| 40 | 4.1  | F | Cauc. | Congen. Glaucoma                                                  | NI   | NI     | 27.38  | 7.86  | 85.91  | NI     | 0.04 | 0.06 |

|    |      |   |       |                                    |        |        |       |       |        |        |      |      |
|----|------|---|-------|------------------------------------|--------|--------|-------|-------|--------|--------|------|------|
| 41 | 6.08 | M | Cauc. | Strabismus                         | NI     | NI     | 12.41 | 3.43  | 71.22  | 29,918 | 0.09 | 0.09 |
| 42 | 4.25 | F | Cauc. | Strabismus                         | 232.55 | 393.73 | 33.88 | 9.86  | 158.79 | NI     | 0.11 | 0.12 |
| 43 | 5.67 | M | Cauc. | Strabismus                         | NI     | NI     | 42.47 | 12.47 | 224.96 | 37,528 | 0.09 | 0.09 |
| 44 | 0.5  | F | Cauc. | Oculocutaneous albinism, nystagmus | NI     | NI     | 16.16 | 1.15  | 83.55  | 11,858 | 0    | 0    |
| 45 | 0.23 | F | MR    | PHPV OS                            | 1.8    | 4.97   | 49.85 | 13.87 | 150.21 | 21,998 | 0.04 | NI   |
| 46 | -0.1 | M | Cauc. | ROP Screening                      | 14.39  | 37.96  | 6.63  | 2.87  | 15.49  | 0      | BQ   | BQ   |
| 47 | 0.92 | M | Cauc. | Tear duct obstruction OU           | 11.4   | 22.87  | 58.03 | 11.91 | 187.67 | 14,592 | 0.07 | 0.06 |
| 48 | 1.67 | F | MR    | Septo-optic dysplasia              | 111.23 | 613.23 | 31.98 | 12.42 | 120.14 | 18,794 | 0.08 | 0.07 |
| 49 | 6.05 | F | Hisp. | Strabismus                         | 51.9   | 607.06 | 40.99 | 18.12 | 153.01 | 28,233 | 0.12 | 0.14 |
| 50 | 2.15 | M | Cauc. | Unexplained photophobia            | 11.03  | 56.89  | 76.88 | 22.24 | 350.27 | 46,916 | 0.08 | 0.12 |
| 51 | 3.46 | F | Cauc. | ON hypoplasia                      | 13.79  | 29.92  | 46.76 | 17.48 | 145.39 | 20,894 | NI   | 0.08 |

#### Age Group

1-4 years

4-7 years

full term under 1 year

<34 weeks gestation

#### Race/Ethnicity

Cauc.= Caucasian

Hisp.= Hispanic

MR = Multi-racial

background

#### Carotenoid Intake

NI = No Information

#### Raman

NI = No information

DNV = Data not valid (Instrument miscalibration)

#### MPOD

NI = No information

BQ = Bad quality image, unable to process

#### Diagnosis

**PHPV** = Persistent hyperplastic primary vitreous **ROP** = Retinopathy of prematurity **PCIOL** = Posterior chamber interocular lens

**RB** = Retinoblastoma **FEVR** = Familial exudative vitreoretinopathy **ON** = Optic nerve

**OD** = Right Eye **OS** =Left Eye **OU** = Both Eyes
